# Supplementary material
Source: PubMed Central journal article supplement (PMC6592823)
Supplement: EMS83456-supplement-Supplementary_figures.pdf [file EMS83456-supplement-Supplementary_figures.pdf]

# Supplementary Figure 1

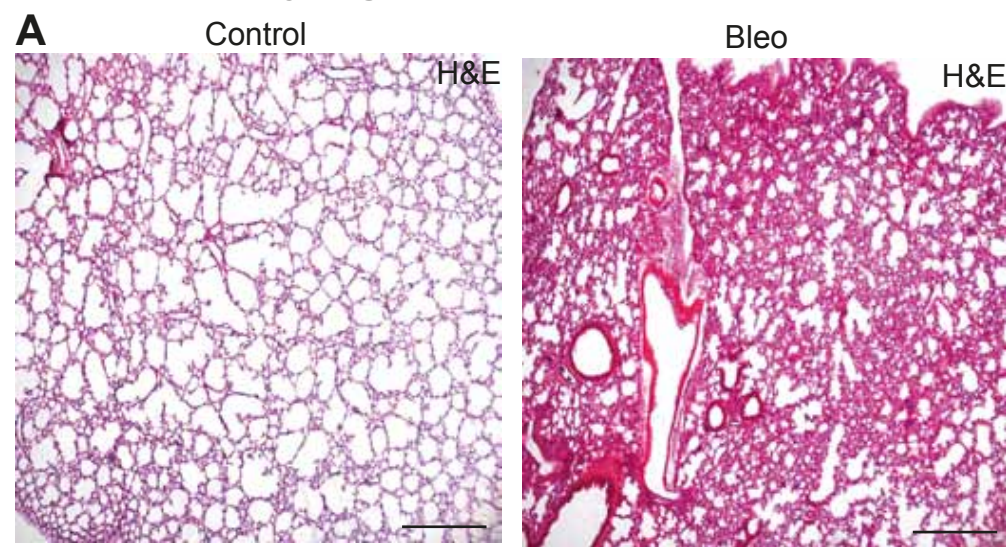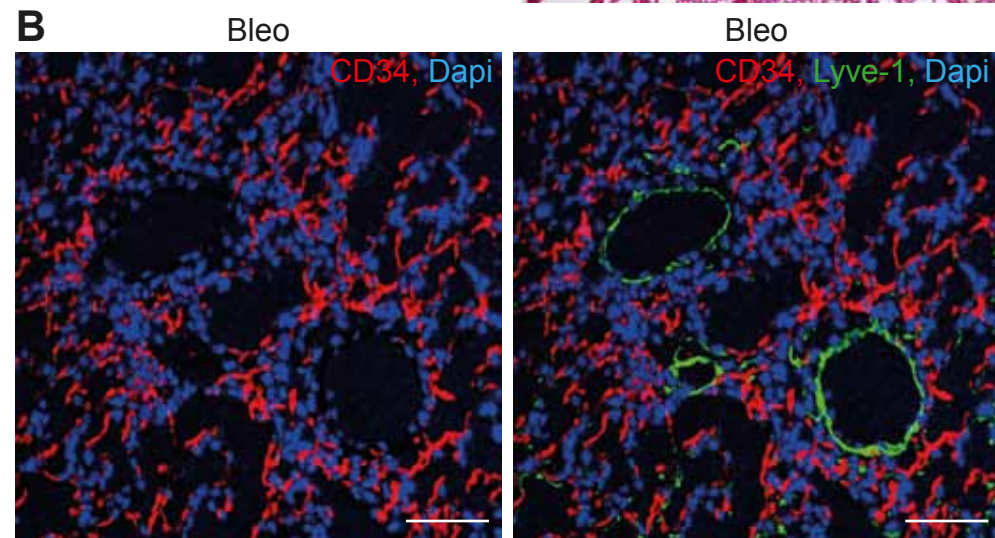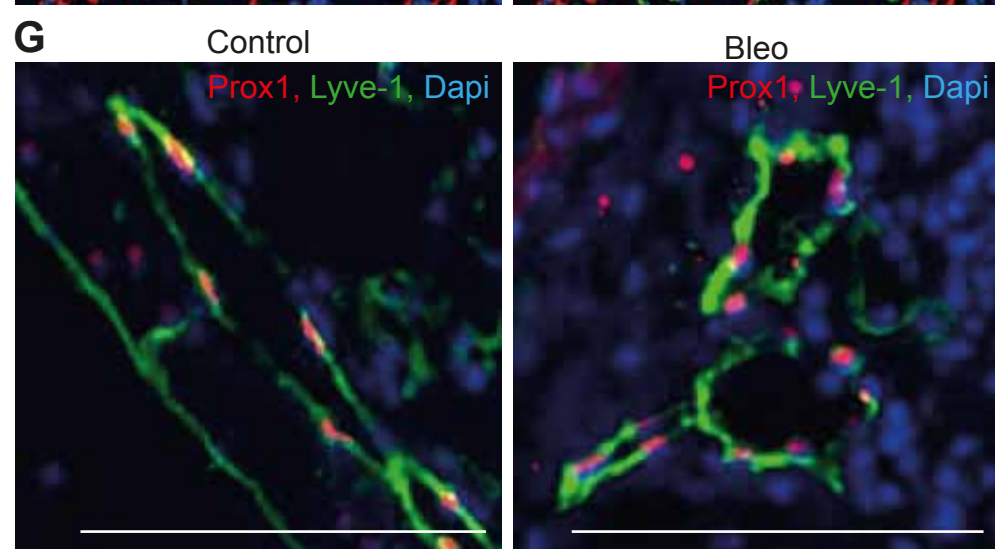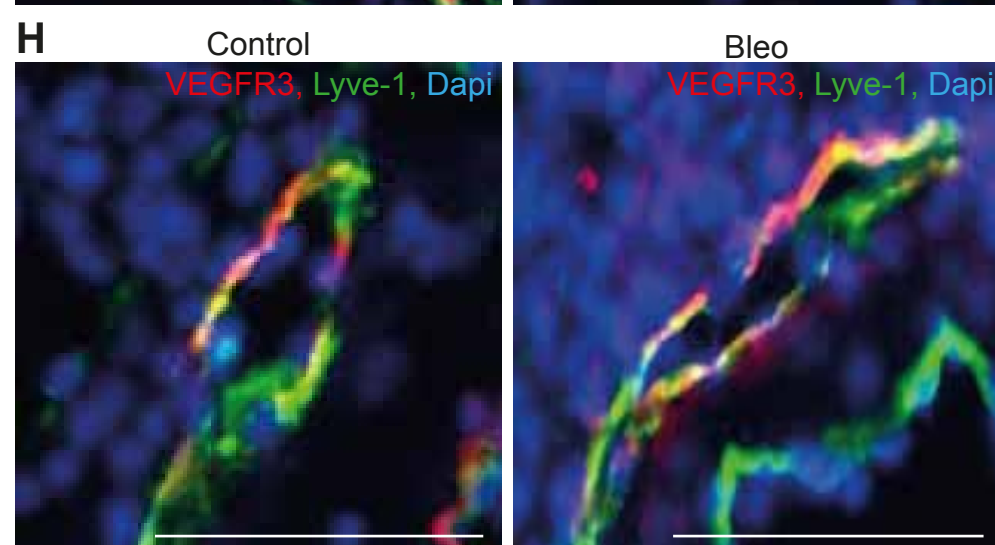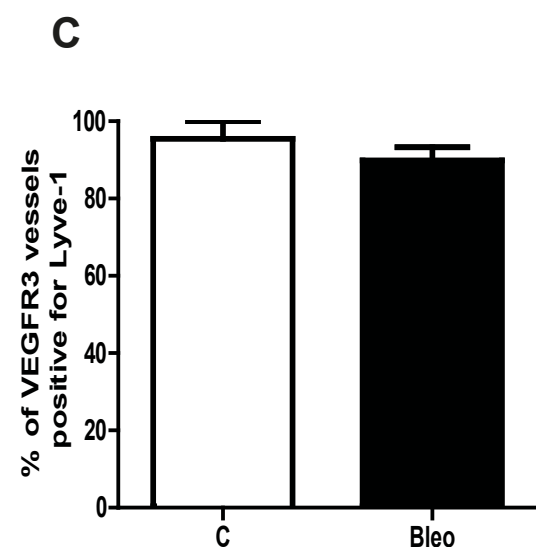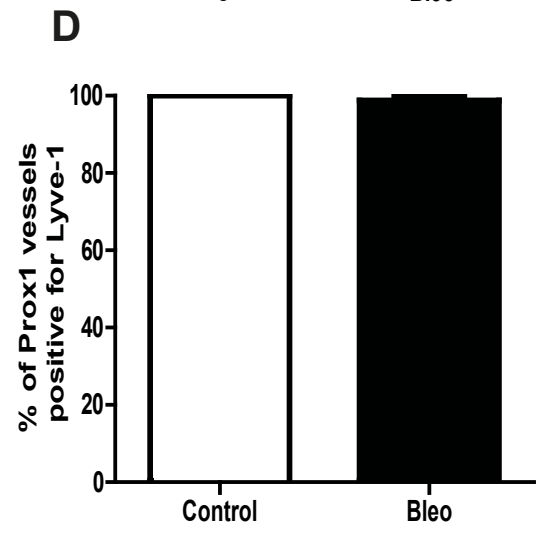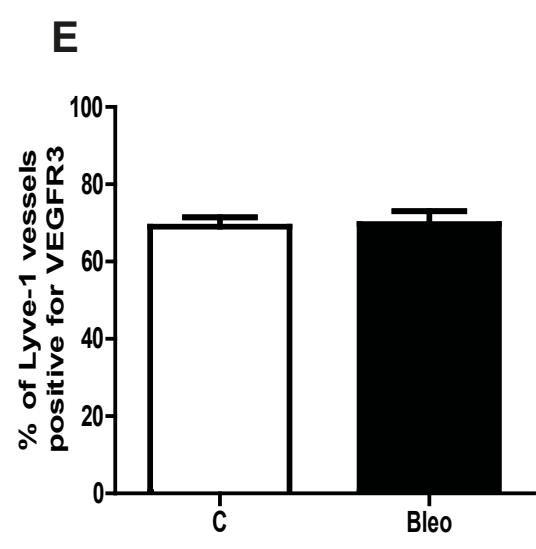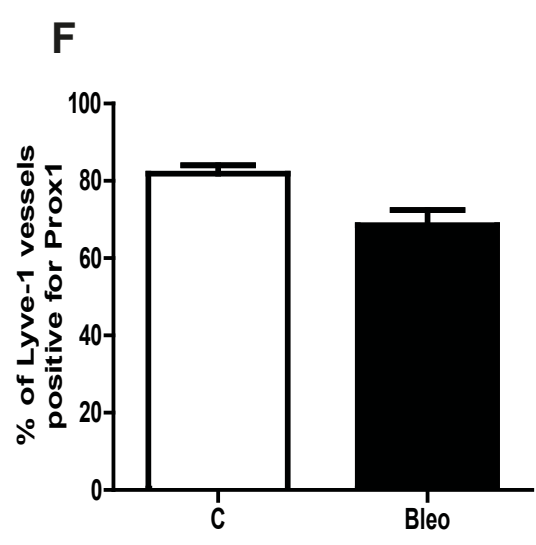

# Supplementary Figure 2

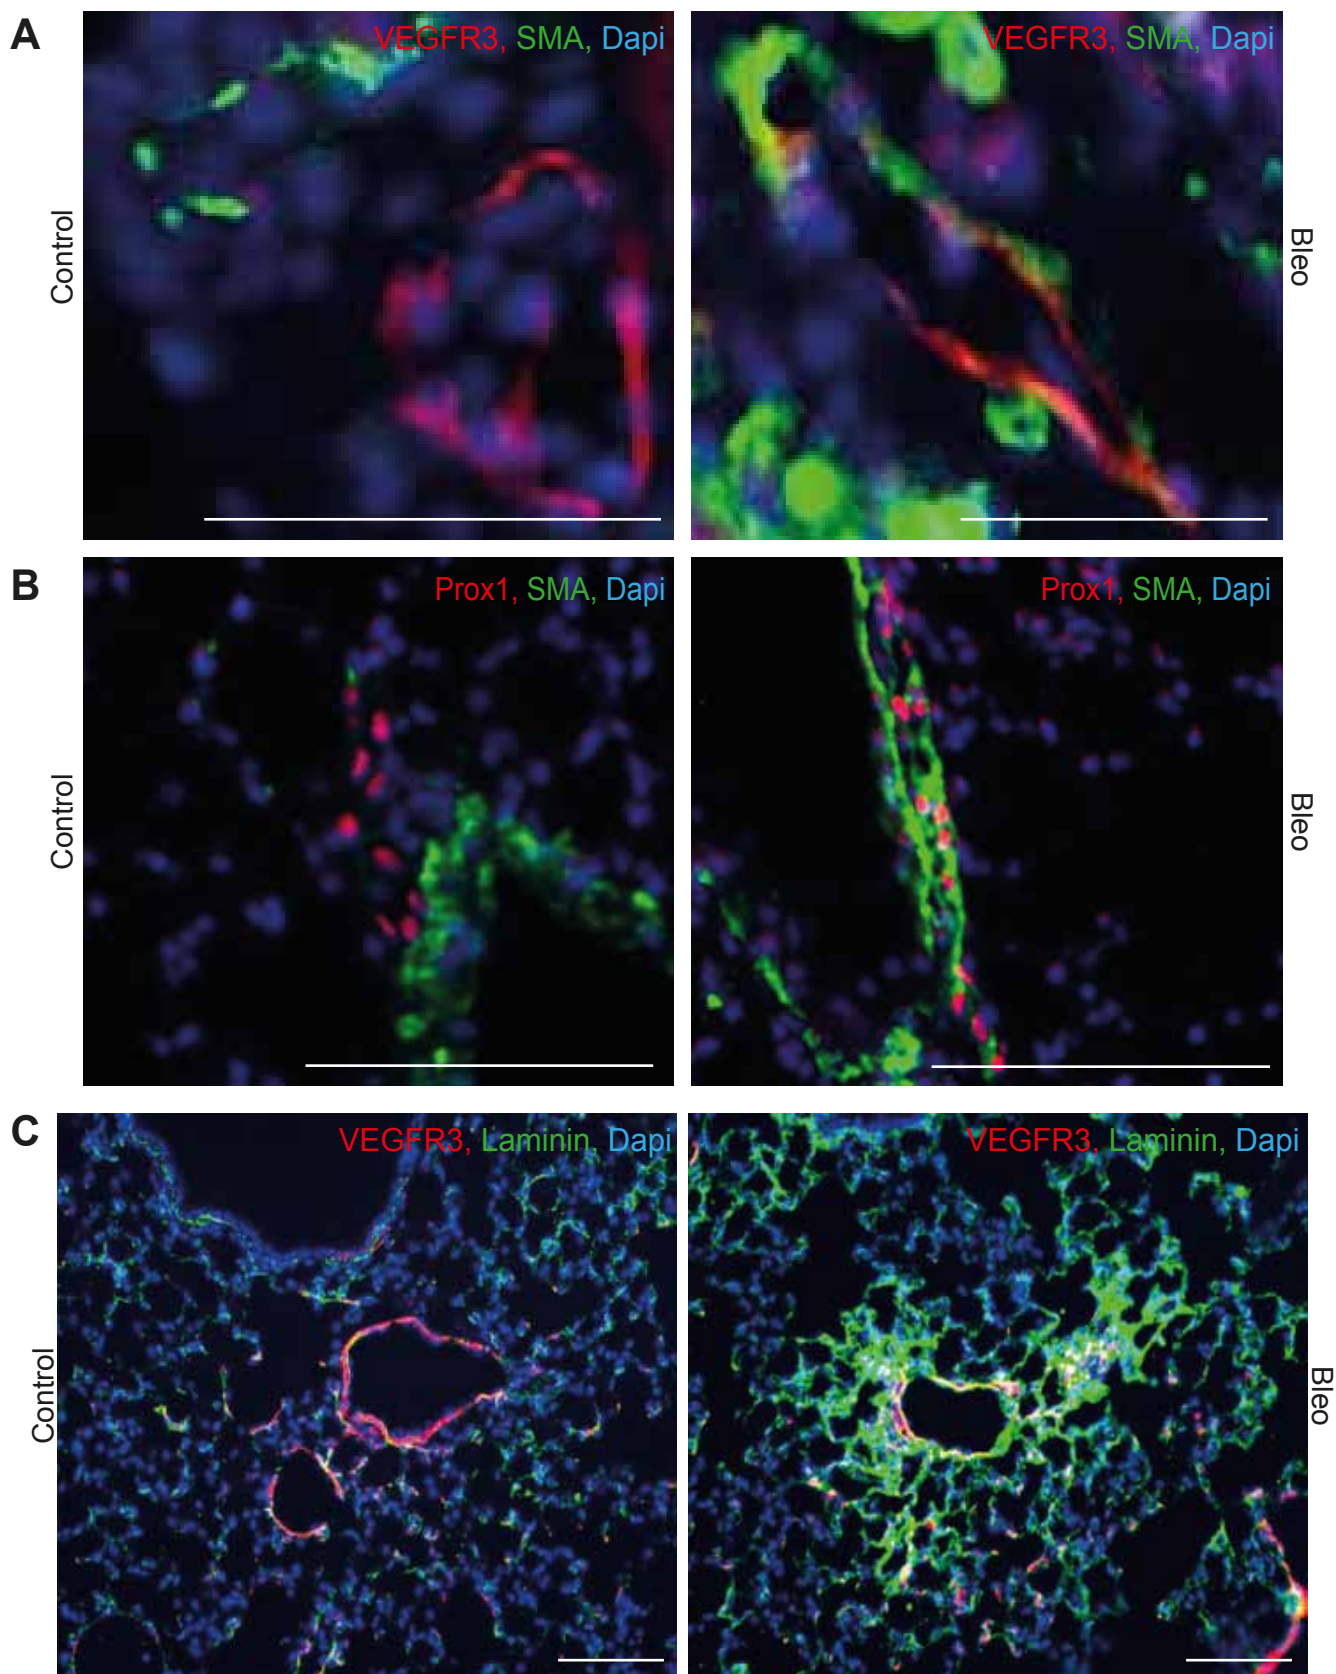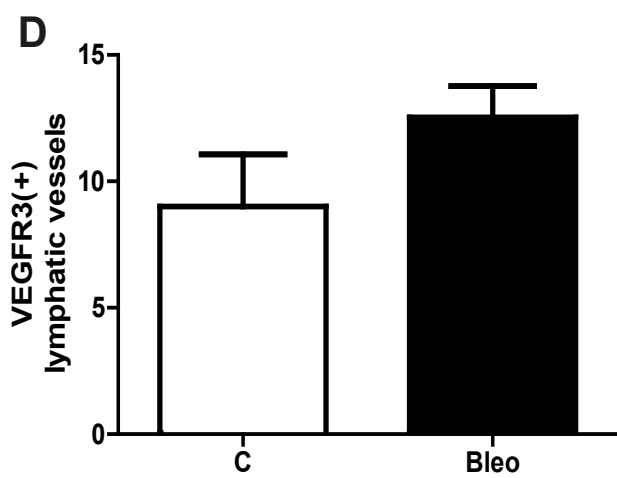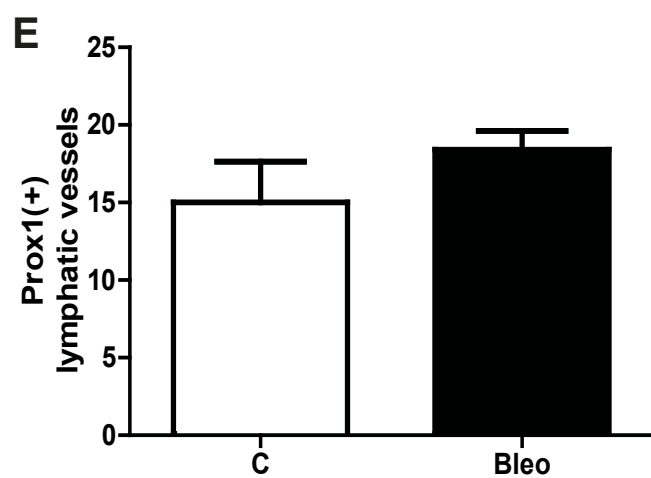

# Supplementary Figure 3

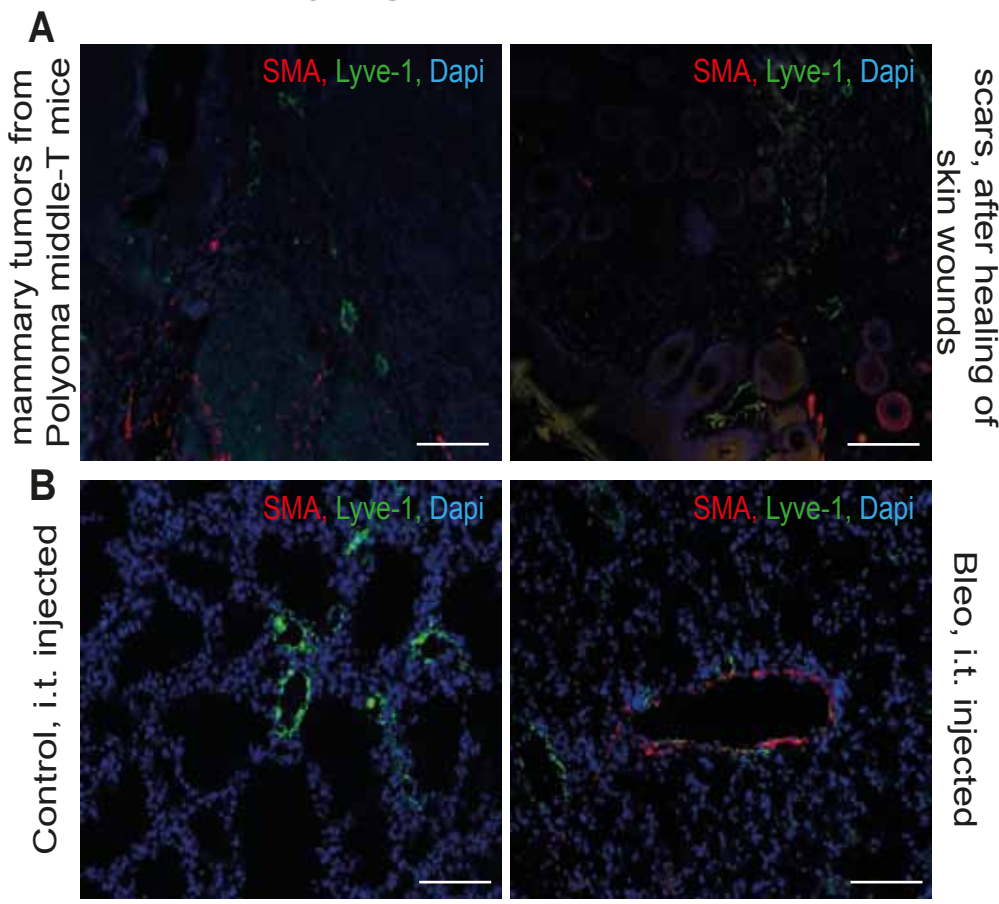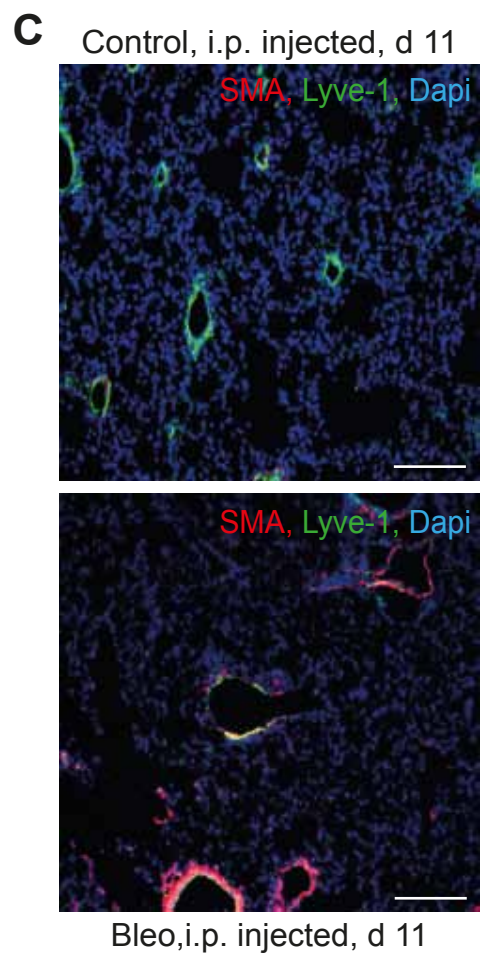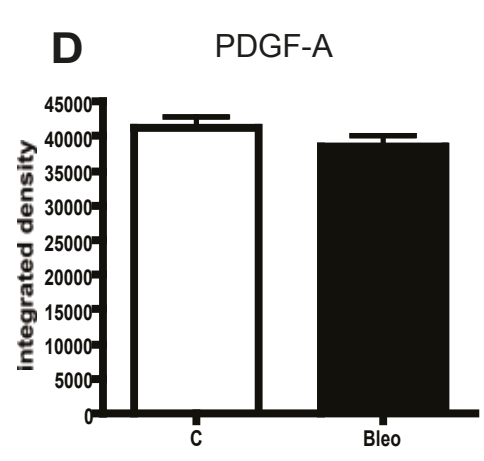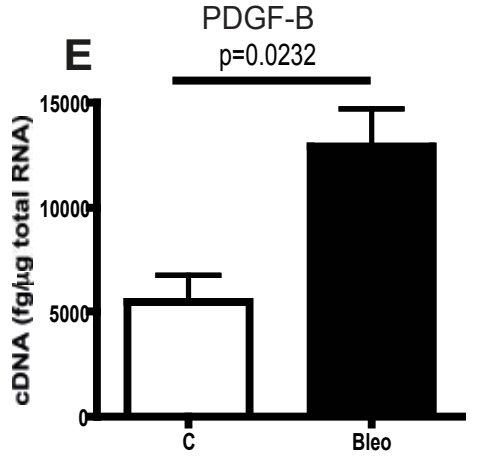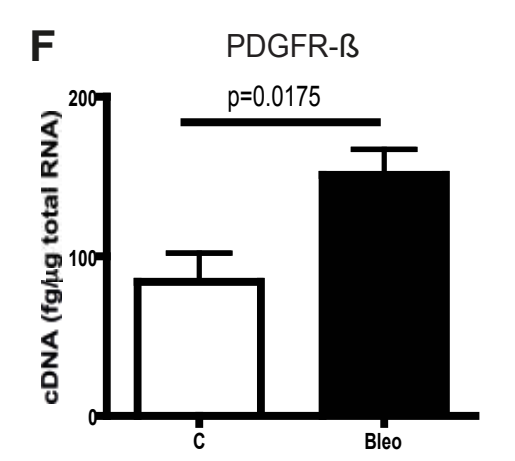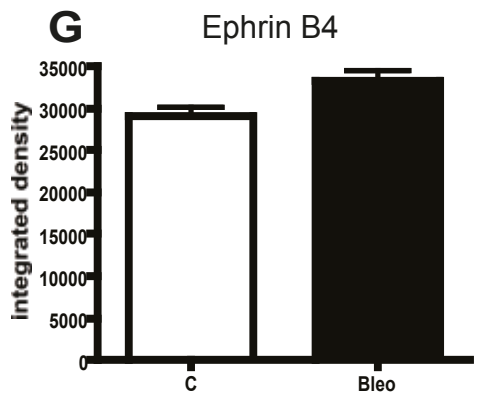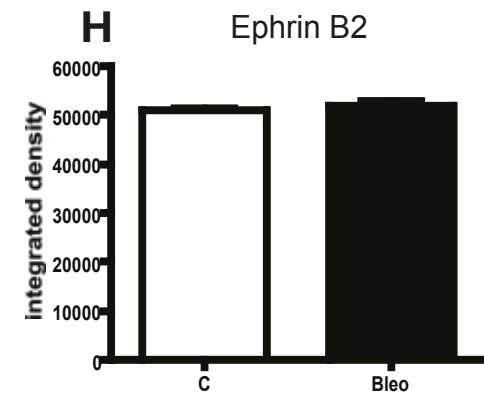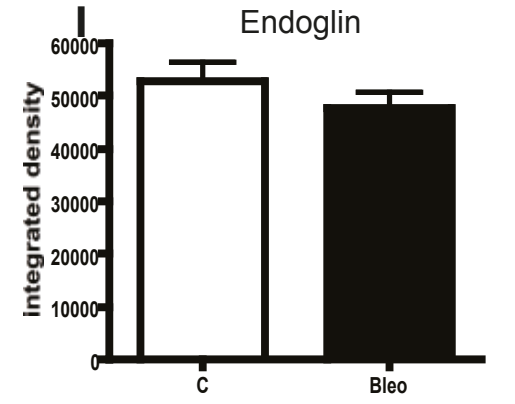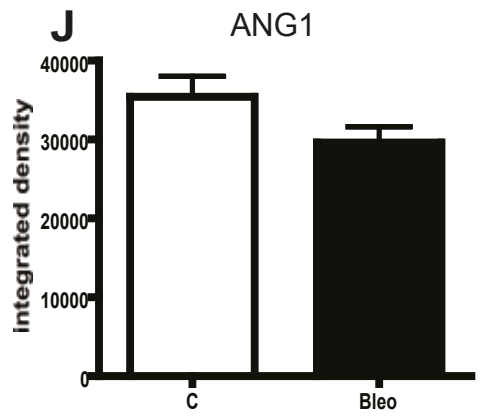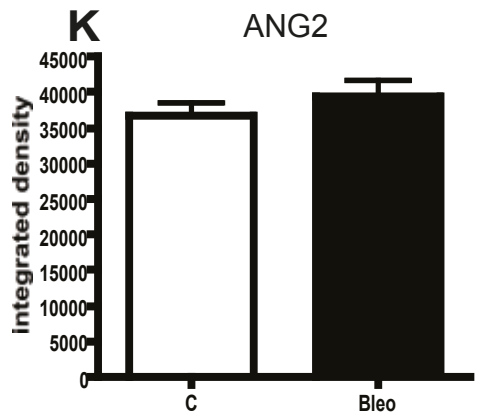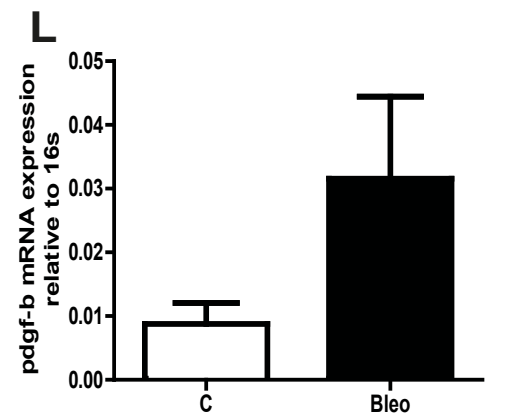

# Supplementary Figure 4

**A** Control

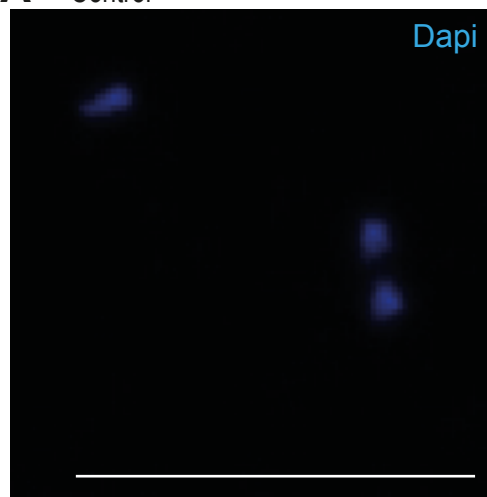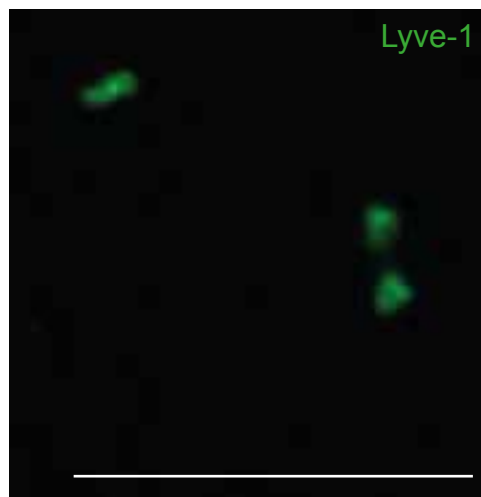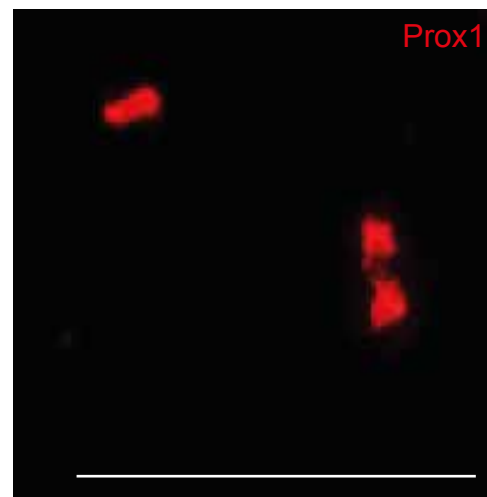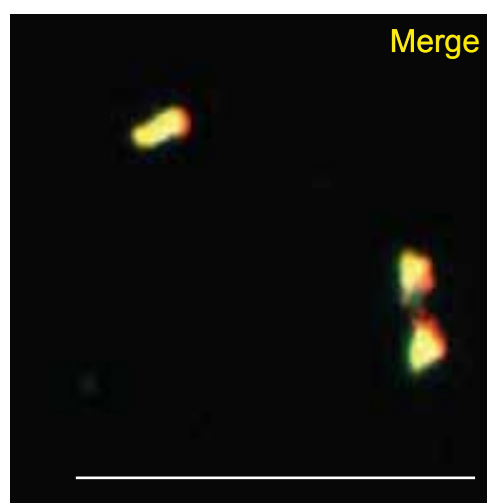

**B** lymphatic endothelial cells, control

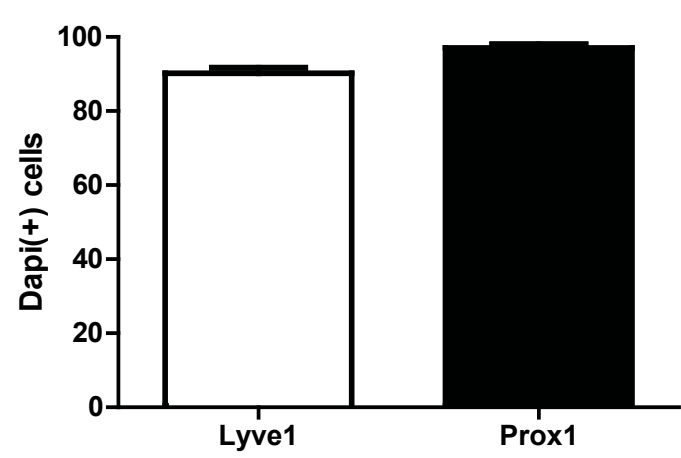

**C** Bleo

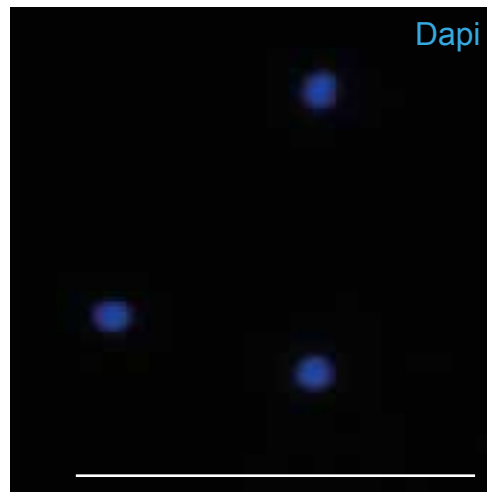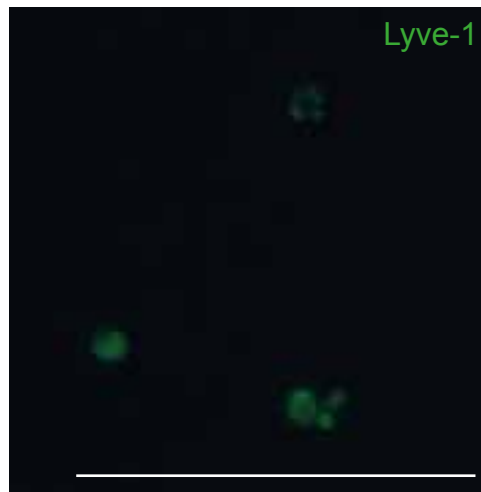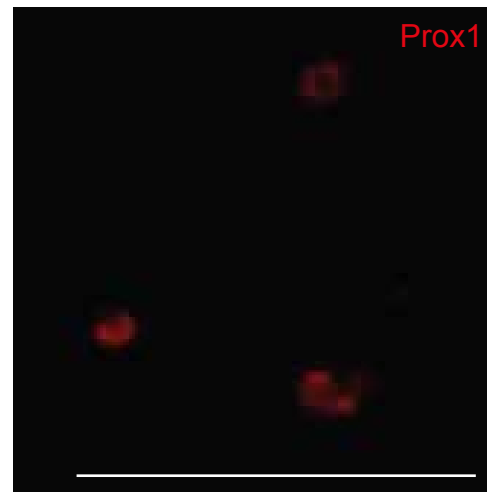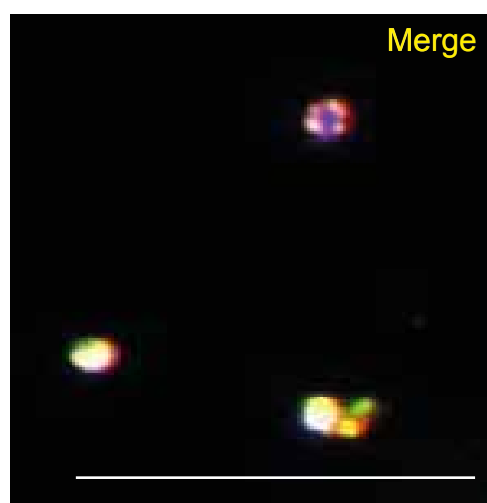

**D** lymphatic endothelial cells, bleo

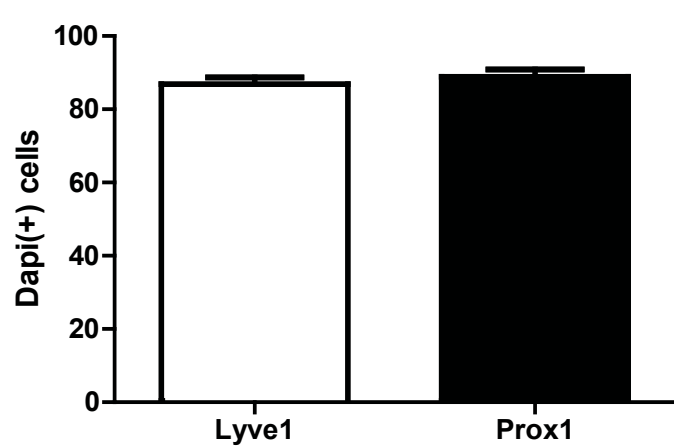

# Supplementary Figure 5

Bleo + AG-1296

**A**

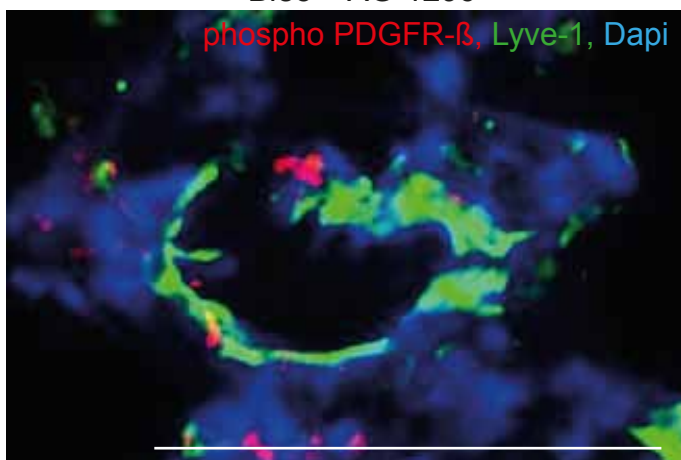

**B**

Control

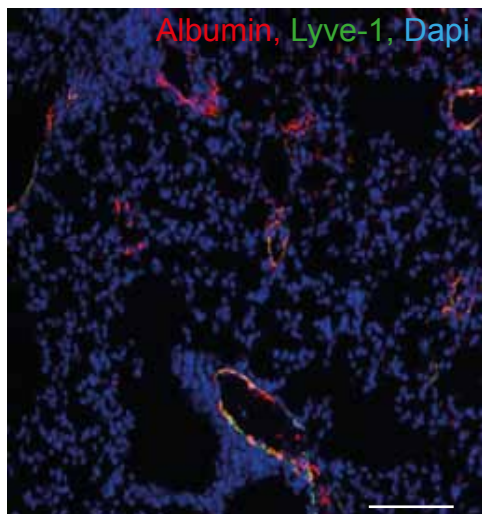

Bleo, early stage

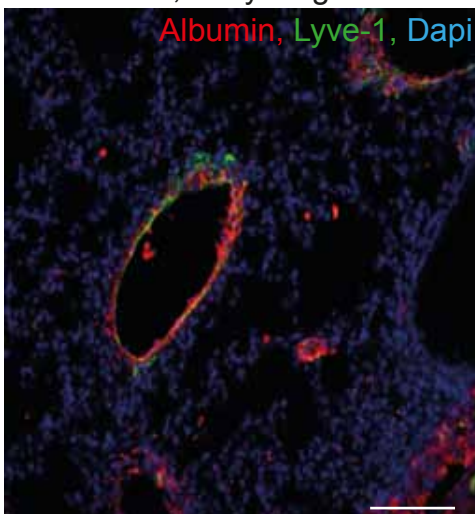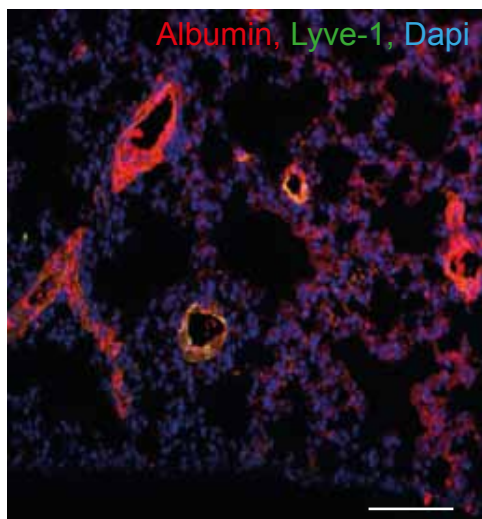

Bleo, intermediate stage

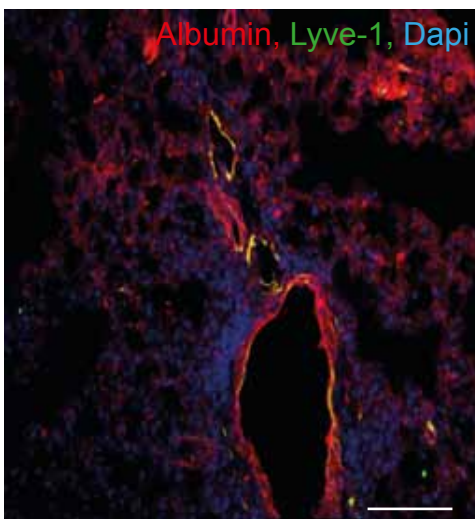

Bleo, late stage

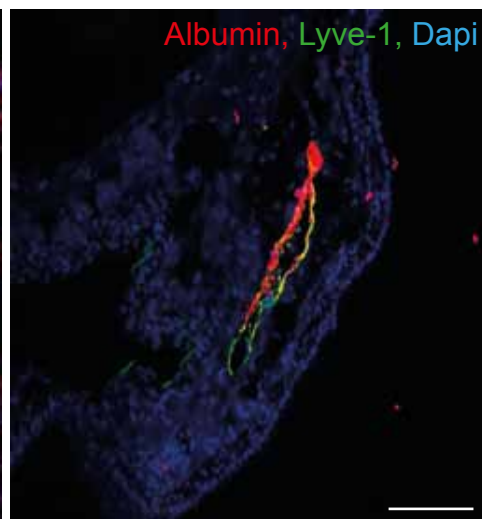

Bleo + AG-1296

**C**

Control, 488-dextran i.v.

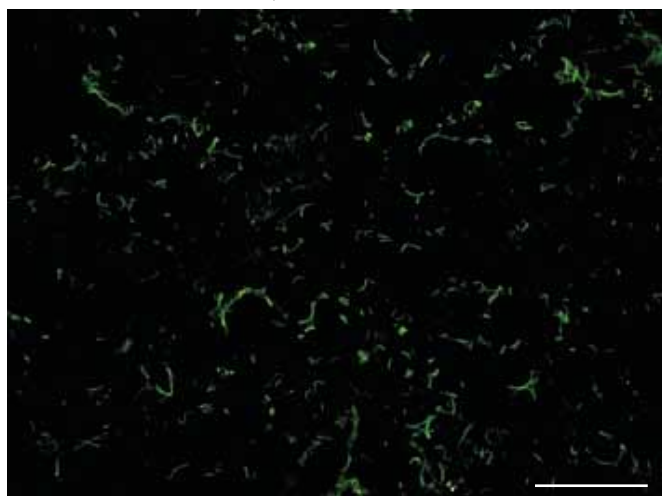

Bleomycin, 488-dextran i.v.

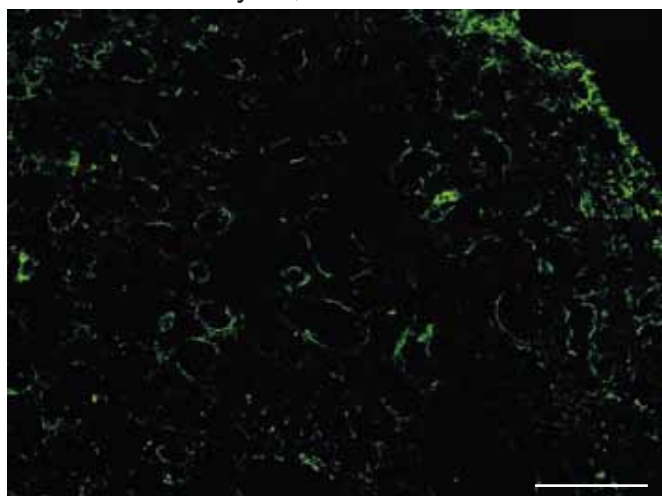

## Supplementary Figure 1

(A) Hematoxylin and Eosin histology on lung tissue of mice treated with bleomycin (Bleo) or with PBS (Control) at day 28. Scale bars equal 500  $\mu\text{m}$ .

(B) Immunodetection of blood vessels (CD34) and simultaneous detection of blood vessels (CD34) and lymphatic vessels (Lyve-1) on lungs of bleomycin treated mice at day 28. Scale bars equal 100  $\mu\text{m}$ .

(C) Quantitative analysis of the amount of VEGFR3-positive lymphatic vessels which are positive for Lyve-1 on lung tissue of bleomycin- and PBS-treated mice at day 28 (controls n= 3, Bleo n=6, Bleo + AG-1296 n=6).

(D) Quantitative analysis of the amount of Prox1-positive lymphatic vessels which are positive for Lyve-1 on lung tissue of Bleo and control mice at day 28 (controls n= 3, Bleo n=6, Bleo + AG-1296 n=6).

(E) Quantitative analysis of the amount of Lyve-1-positive vessels which are positive for VEGFR3 on lung tissue of bleomycin-treated and control mice at day 28 (controls n= 3, Bleo n=6, Bleo + AG-1296 n=6).

(F) Quantitative analysis of the amount of Lyve-1-positive vessels which are positive for Prox1 on lungs of bleomycin- and PBS-treated mice at day 28 (controls n= 3, Bleo n=6, Bleo + AG-1296 n=6). Error bars show s.e.m.

(G) Double staining of lymphatic vessels with the markers Prox1 and Lyve-1 on lung tissue of healthy PBS-treated (100  $\mu\text{l}$  twice a week i.p.) and fibrotic bleomycin-treated (10 mg/kg body weight twice a week i.p.) mice at day 28. Scale bars equal 100  $\mu\text{m}$ .

(H) Simultaneous immunodetection of lymphatic vessels with VEGFR3 and Lyve-1 on tissue of control and fibrotic lungs at day 28. Scale bars equal 100  $\mu\text{m}$ .

### **Supplementary Figure 2**

(A) Double staining of lymphatic vessels (VEGFR3) and mural cells (SMA) on lung tissue of healthy PBS-treated and fibrotic bleomycin-treated mice at day 28. Scale bars equal 100  $\mu\text{m}$ .

(B) Simultaneous immunodetection of lymphatic vessels with the marker Prox1 and mural cells (SMA) on tissue of control and fibrotic lungs at day 28. Scale bars equal 100  $\mu\text{m}$ .

(C) Immunodetection of basement membrane (Laminin) and lymphatic vessels (VEGFR3) on lung sections of bleomycin-treated and PBS-treated mice at day 28. Scale bars equal 100  $\mu\text{m}$ .

(D) Quantitative analysis of VEGFR3-positive lymphatic vessels of fibrotic and healthy lungs at day 28 (control n=15, Bleo n=29).

(E) Quantitative analysis of Prox1-positive lymphatic vessels of fibrotic and healthy lungs at day 28 (control n=5, Bleo n=6). Error bars show s.e.m.

### **Supplementary Figure 3**

(A) Simultaneous detection of mural cells (SMA) and lymphatic vessels (Lyve-1) on tissue of mammary tumors from polyoma middle-T mice and on murine cutaneous wounds. Scale bars equal 100  $\mu\text{m}$ .

(B) Double staining of SMA and Lyve-1 on lung tissue at day 14 after intratracheal (i.t.) injection of bleomycin or PBS, respectively. Scale bars equal 100  $\mu\text{m}$ .

(C) Immunodetection of mural cells (SMA) and lymphatic vessels (Lyve-1) in fibrotic lungs of mice treated with bleomycin (Bleo) and in healthy control tissue of mice treated with PBS at day 11. Scale bars equal 100  $\mu\text{m}$ .

(D-K) Gene expression and quantitative analysis of pdgf-a, pdgf-b, pdgfr- $\beta$ , ephrin b4, ephrin b2, angiopoietin 1 (ANG1), angiopoietin 2 (ANG2) and endoglin in fibrotic lungs from bleomycin-treated mice and in healthy controls from mice treated with PBS at day 28 (Bleo n=10, control n=8).

(L) Quantitative analysis of the pdgfr- $\beta$  expression in isolated lymphatic endothelial cells of control mice at day 28. Lymphatic endothelial cells were either cultured with bleomycin-supplemented Medium (Bleo) (10  $\mu\text{g/ml}$  Medium, 12 h) or Medium without bleomycin (control) (12 h). Error bars show s.e.m.

#### **Supplementary Figure 4:**

(A) Double-staining for Lyve-1 and Prox1 on isolated lymphatic endothelial cells (LEC) of healthy control (100  $\mu\text{l}$  PBS twice a week i.p.) mice at day 28 (n=6). Scale bars equal 100  $\mu\text{m}$ .

(C) Quantitative analysis of Lyve-1- and Prox1-positive LECs of control mice standardized to Dapi-positive cells.



(B) Simultaneous immunodetection of Lyve-1 and Prox1 on isolated LECs of bleomycin-treated (Bleo) (10 mg/kg body weight twice a week i.p.) mice at day 28 (n=4). Scale bars equal 100  $\mu$ m.

(D) Quantitative analysis of Lyve-1- and Prox1-positive LECs of bleo mice standardized to Dapi-positive cells. Error bars show s.e.m.

**Supplementary Figure 5:**

(A) Double immunodetection of phospho-PDGFR- $\beta$  and Lyve-1 on lung tissue of mice that were treated with bleomycin+AG-1296 at day 28. Scale bars equal 100  $\mu$ m.

(B) Simultaneous immunodetection of albumin and Lyve-1 on lungs of mice treated with bleomycin (Bleo), bleomycin+AG-1296 (Bleo+AG-1296) or in healthy control lungs of PBS-treated mice, respectively, showing tissue of early, intermediate and late stage fibrosis at day 28. Scale bars equal 100  $\mu$ m.

(C) Fluorescence microscopy of 488-dextran (50  $\mu$ l injected intravenously (i.v.) at day 28) in lung tissue of mice treated with bleomycin (Bleo) and in healthy control lungs of PBS-treated mice, respectively. Scale bars equal 100  $\mu$ m.
